# Supplementary material for: Quantitation Overcoming Matrix Effects of Lipophilic Toxins in Mytilus galloprovincialis by Liquid Chromatography-Full Scan High Resolution Mass Spectrometry Analysis (LC-HR-MS)
Source: Mar Drugs. 2022 Feb 15;20(2):143. doi: 10.3390/md20020143 (PMC8880440; doi:10.3390/md20020143)
Supplement: Supplementary file 1 [file marinedrugs-20-00143-s001.zip › marinedrugs-1598004-supplementary.pdf]

# Supplementary Materials

## **Quantitation overcoming matrix effects of lipophilic toxins in *Mytilus galloprovincialis* by liquid chromatography - full scan high resolution mass spectrometry analysis (LC-HR-MS)**

Camila Q. V. Costa<sup>1</sup>, Inês I. Afonso<sup>1</sup>, Sandra Lage<sup>1</sup>, Pedro Reis Costa<sup>1,2</sup>, Adelino V. M. Canário<sup>1</sup> and José P.

Da Silva<sup>1,\*</sup>

1 Centre of Marine Sciences (CCMAR / CIMAR LA), University of Algarve, Campus de Gambelas, 8005-139, Faro, Portugal; camilaqvdaacosta@gmail.com (C.Q.V.C.); inesiafonso13@gmail.com (I.I.A.); smlage@ualg.pt (S.L.); prcosta@ipma.pt (P.R.C.); acanario@ualg.pt (A.V.M.C.); jpsilva@ualg.pt (JPDS)

2 Portuguese Institute for the Sea and Atmosphere (IPMA), Av. Brasília, 1449-006 Lisbon, Portugal

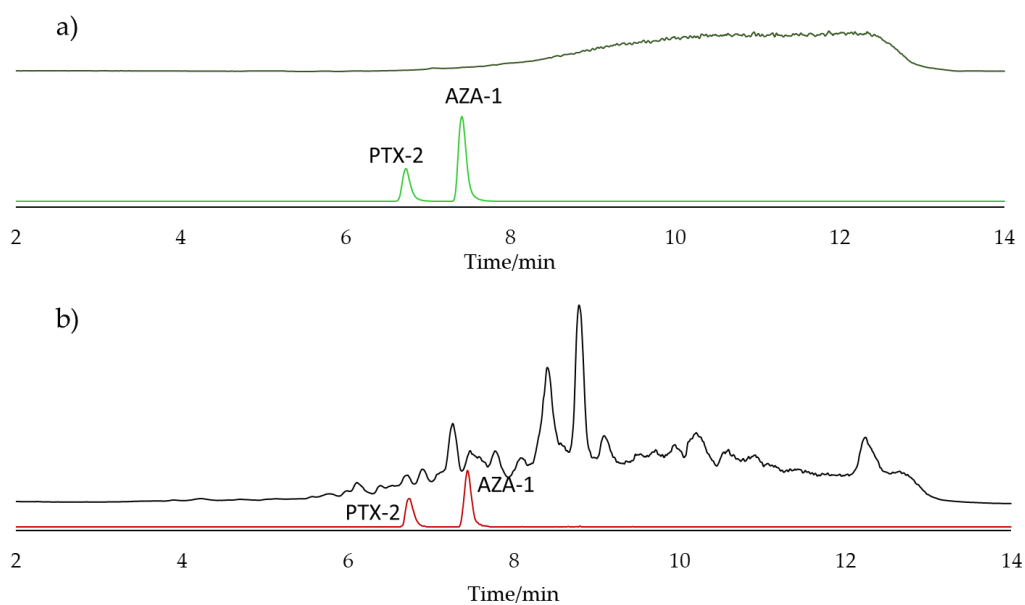

**Figure S1.** LC-HR-MS full scan profiles and correspondent single ion chromatograms obtained after  $m/z$  extraction of values 842.5049 and 876.5104 with  $\pm 5$  ppm window of a methanol standard (a) containing PTX-2 and AZA-1, and a mussel extract after alkaline hydrolysis (b) fortified with the same compounds.

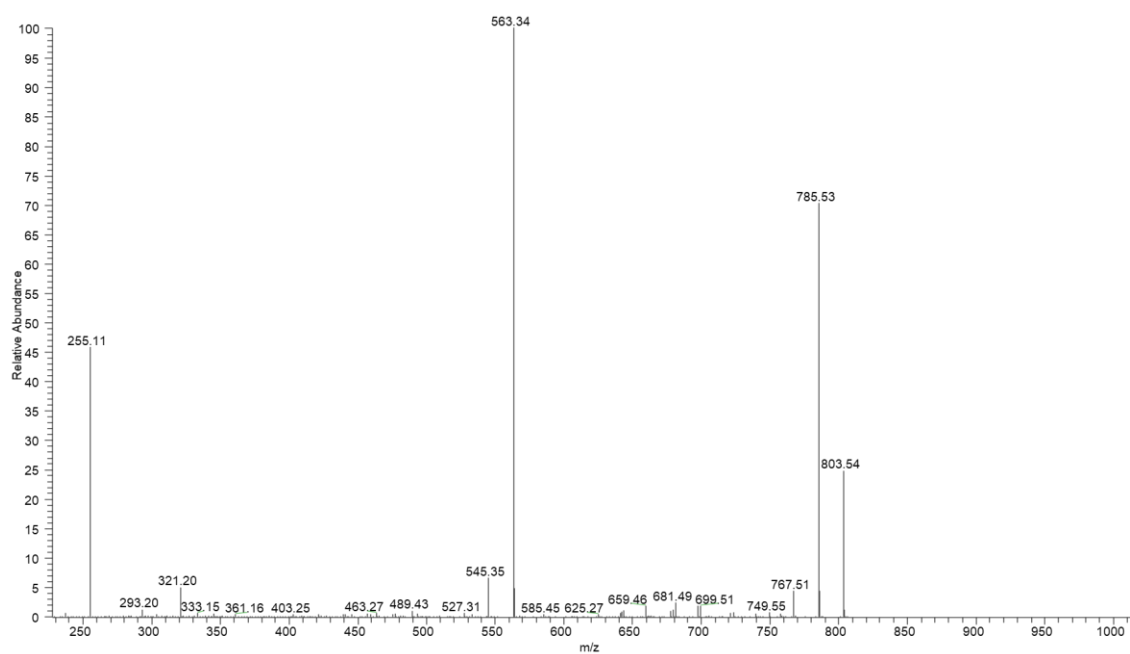

**Figure S2.** CID MS<sup>2</sup> spectrum of OA.

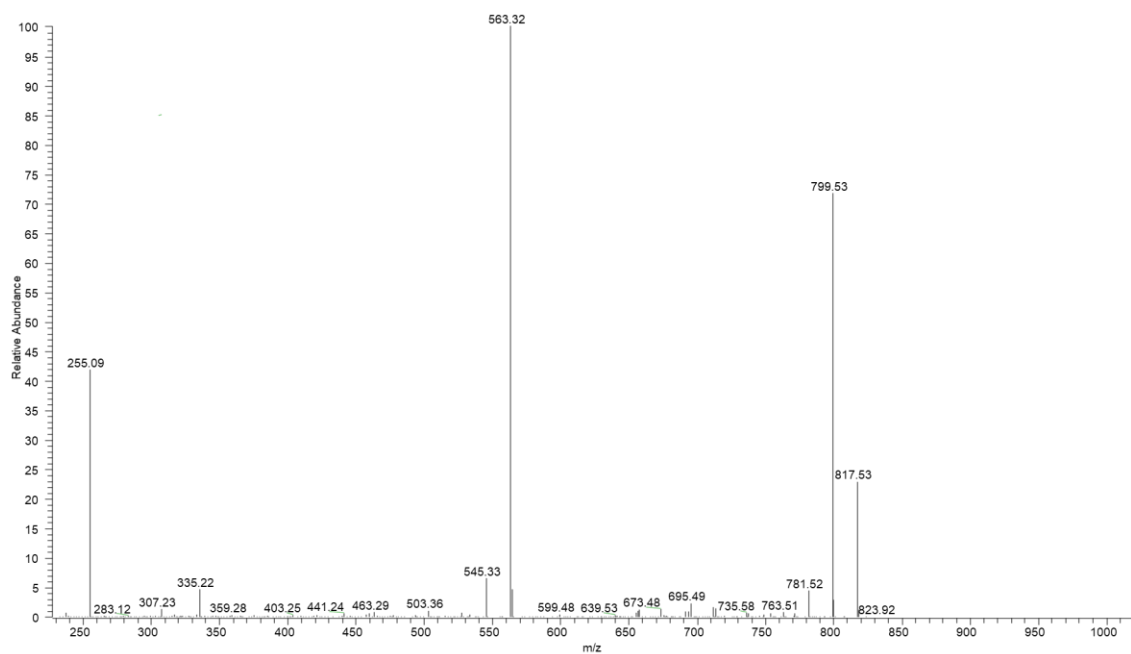

Figure S3. CID MS<sup>2</sup> spectrum of DTX-1.

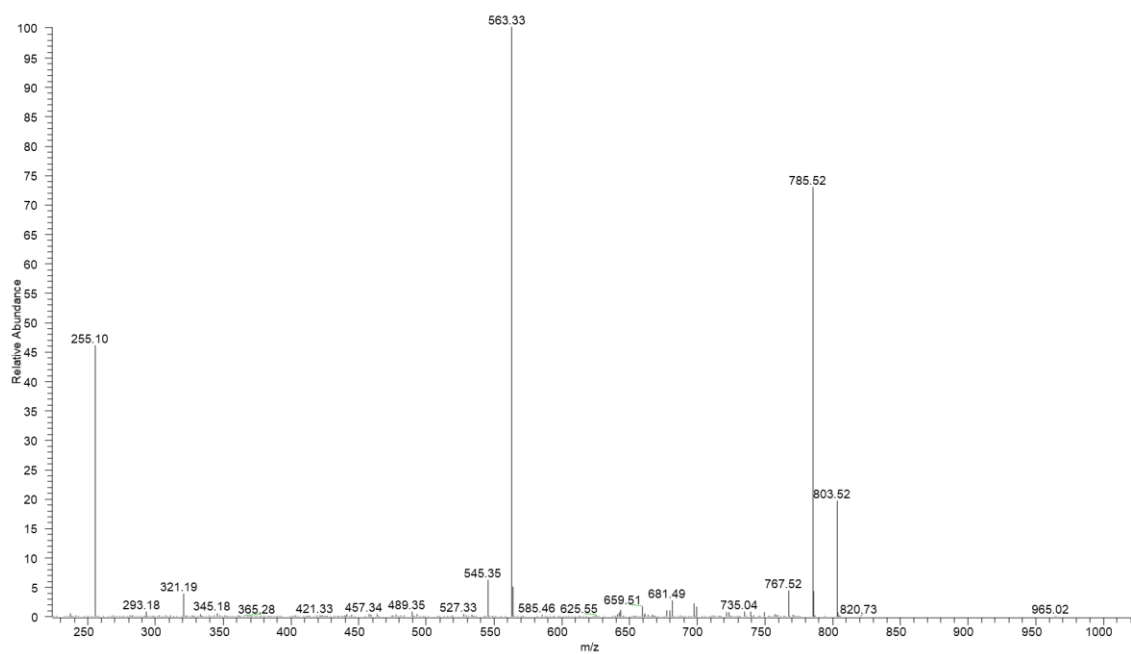

Figure S4. CID MS<sup>2</sup> spectrum of DTX-2.

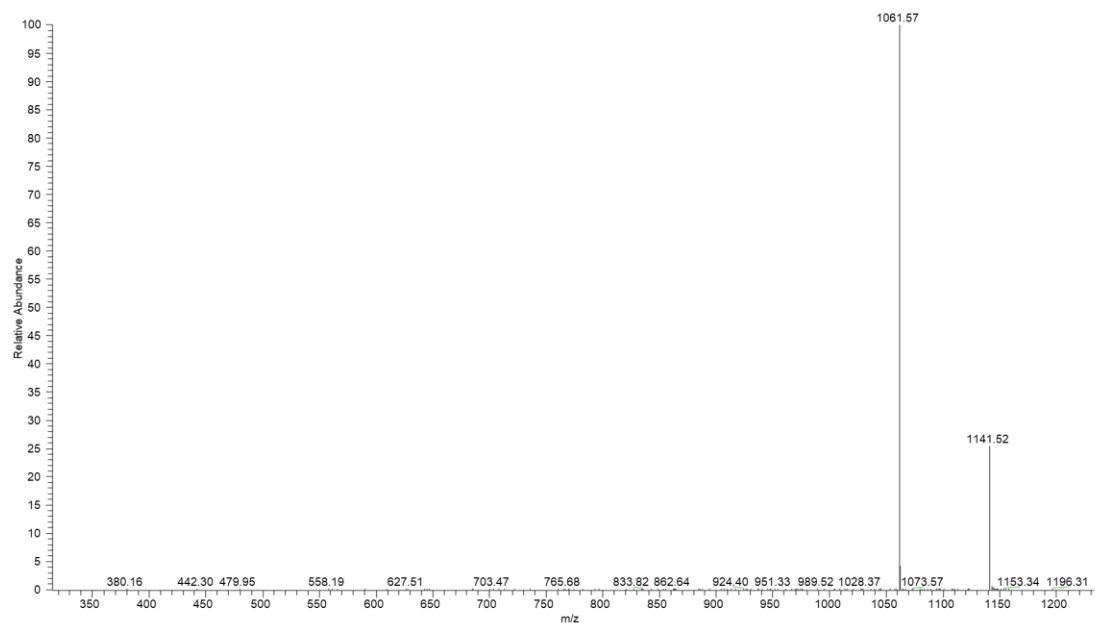

Figure S5. CID MS<sup>2</sup> spectrum of YTX.

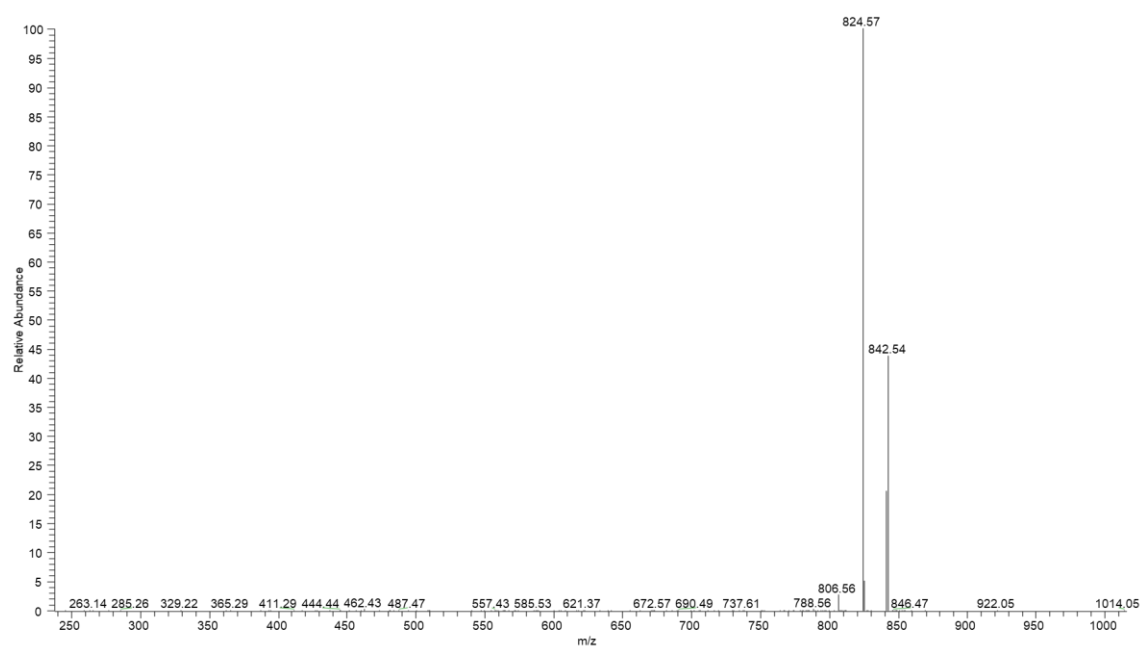

Figure S6. CID MS<sup>2</sup> spectrum of AZA-1.

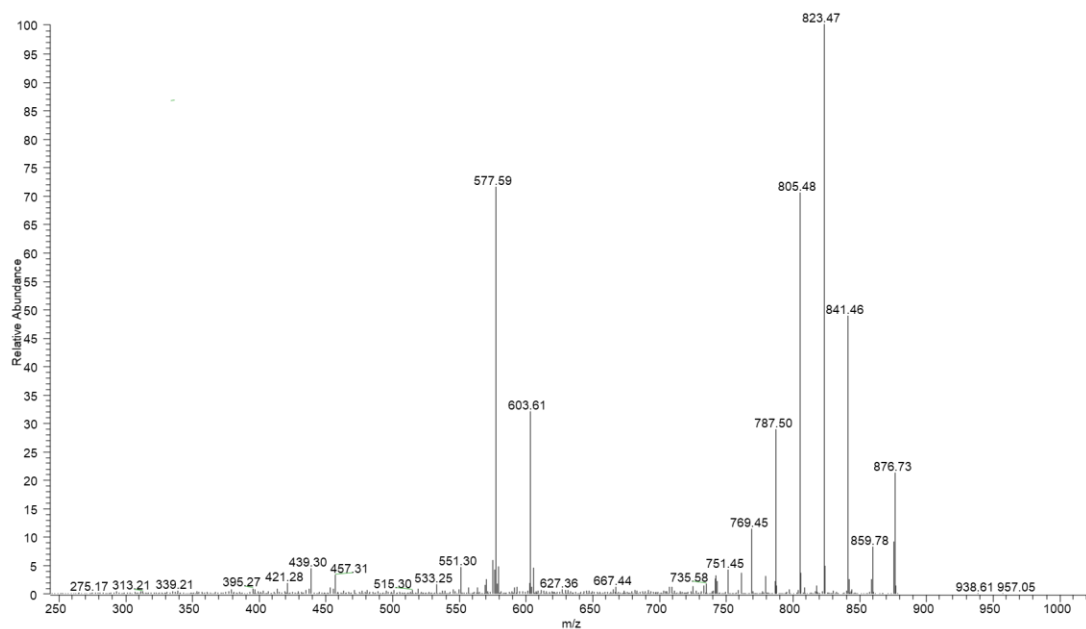

**Figure S7.** CID MS<sup>2</sup> spectrum of PTX-2.

**Table S1.** Ions, retention times, transitions and LOQ of studied toxins.

| Toxin | Mass of ion (+/-) | RT<br>(min) | SRM                 | *LOQ<br>(ng/mL) | **LOQ (ng/mL) |
|-------|-------------------|-------------|---------------------|-----------------|---------------|
| OA    | 803.46 (-)        | 6.31        | 803 → 785; 563; 255 | 1.6             | 3.1           |
| DTX-1 | 817.47 (-)        | 7.18        | 817 → 799; 563; 255 | 3.1             | 3.1           |
| DTX-2 | 803.46 (-)        | 6.57        | 803 → 785; 563; 255 | 1.5             | 3.1           |
| YTX   | 1141.47 (-)       | 6.44        | 1141 → 1061         | 2.3             | 1.9           |
| AZA-1 | 842.50 (+)        | 7.45        | 842 → 806; 824      | 0.7             | 0.4           |
| PTX-2 | 876.51 (+)        | 6.75        | 876 → 823; 805; 577 | 1.4             | 1.6           |

\*Calculated from the standard deviation (SD) of areas obtained after 5 injections of the second lowest concentration (SD\*10). Matrices were extracts of fresh mussels samples, hydrolyzed for OA, DTX-1 and DTX-2 and non-hydrolyzed for the remaining toxins. \*\*Taken from reference Rodriguez et al., Talanta 2018, 189, 622-628.

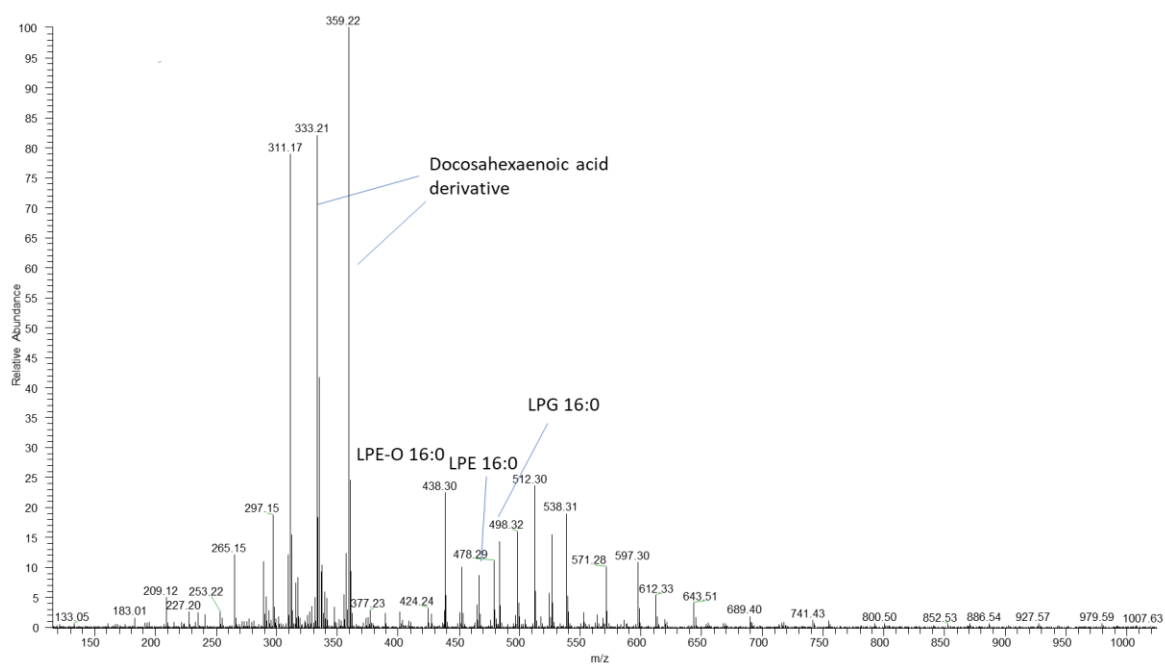

**Figure S8.** Negative polarity average spectrum between 6.1 and 6.7 minutes after injection of a non-hydrolyzed extract of mussel sample.

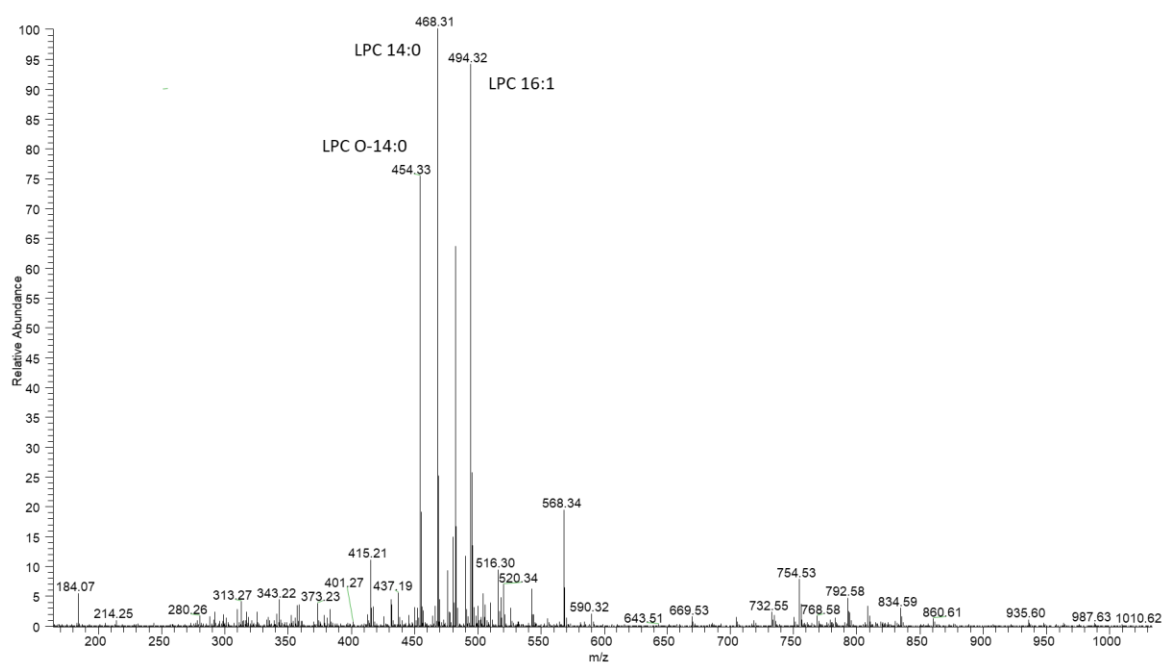

**Figure S9.** Positive polarity average spectrum between 6.1 and 6.7 minutes after injection of a non-hydrolyzed extract of mussel sample.

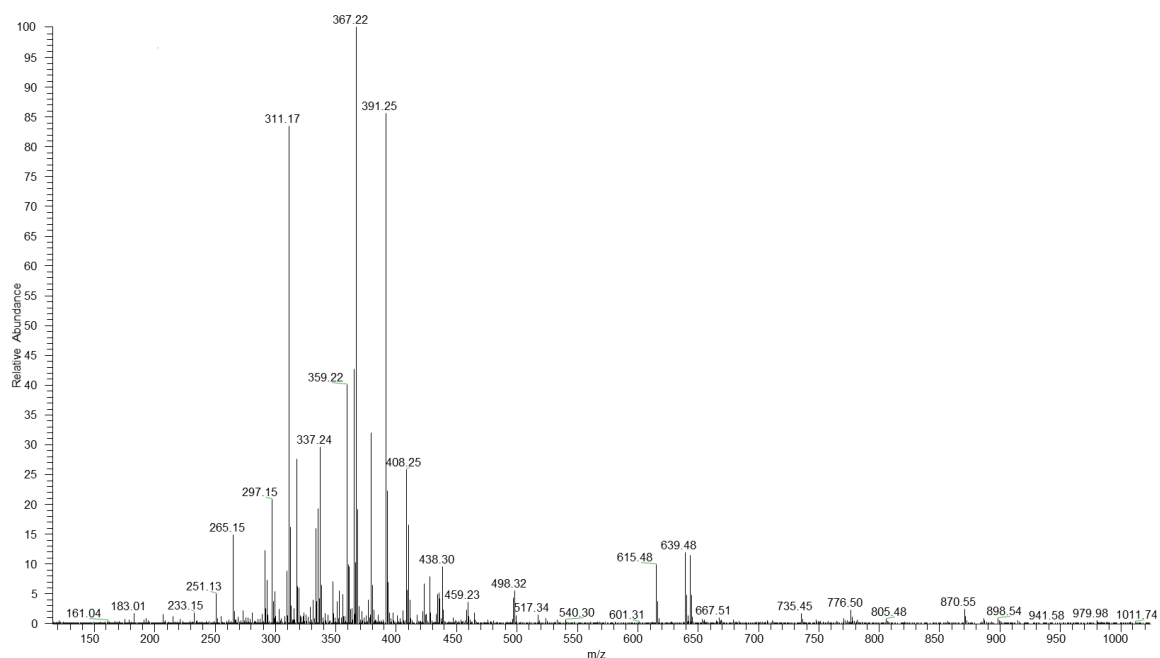

**Figure S10.** Negative polarity average spectrum between 6.1 and 6.7 minutes after injection of a hydrolyzed extract of mussel sample.

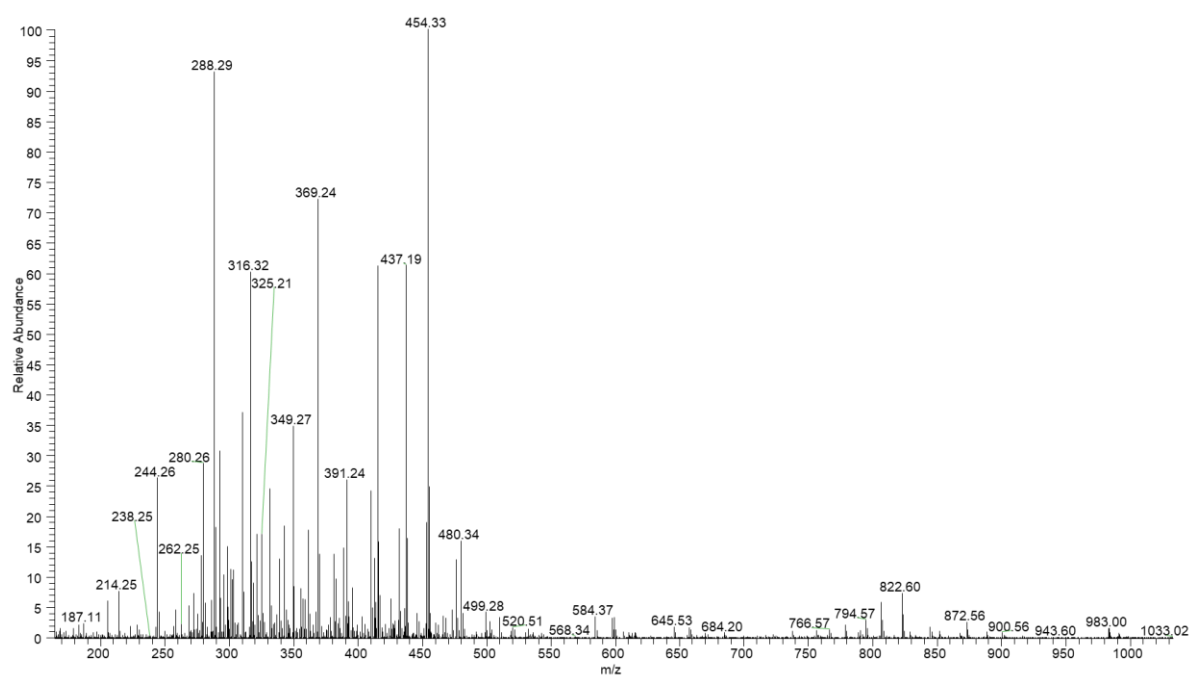

**Figure S11.** Positive polarity average spectrum between 6.1 and 6.7 minutes after injection of a hydrolyzed extract of mussel sample.

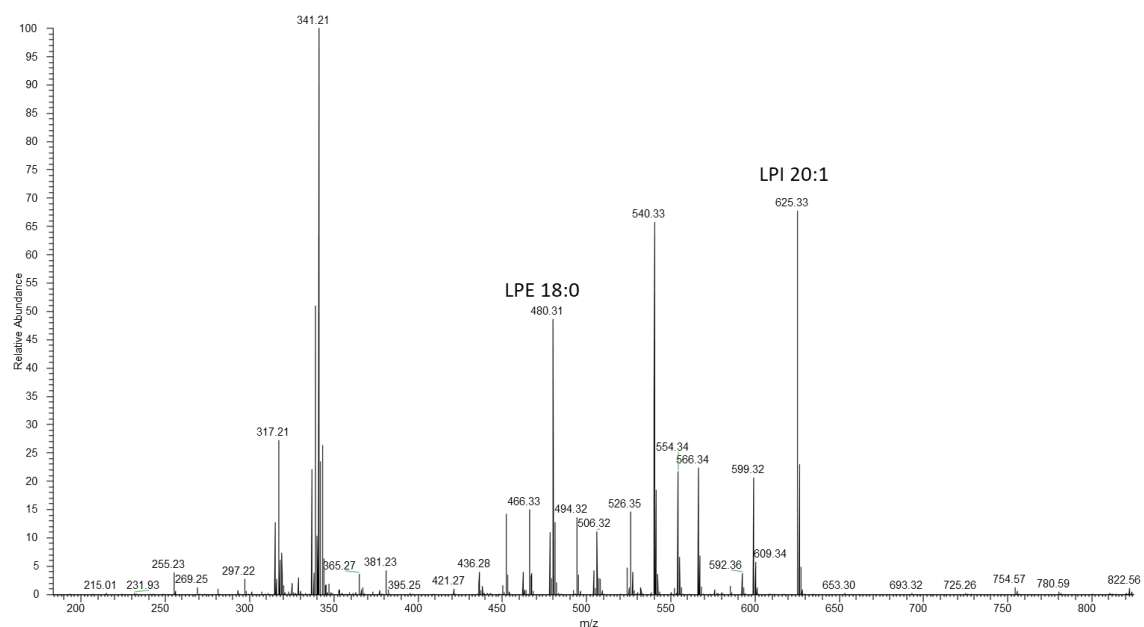

**Figure S12.** Negative polarity average spectrum between 7.1 and 7.6 minutes after injection of a non-hydrolyzed extract of mussel sample.

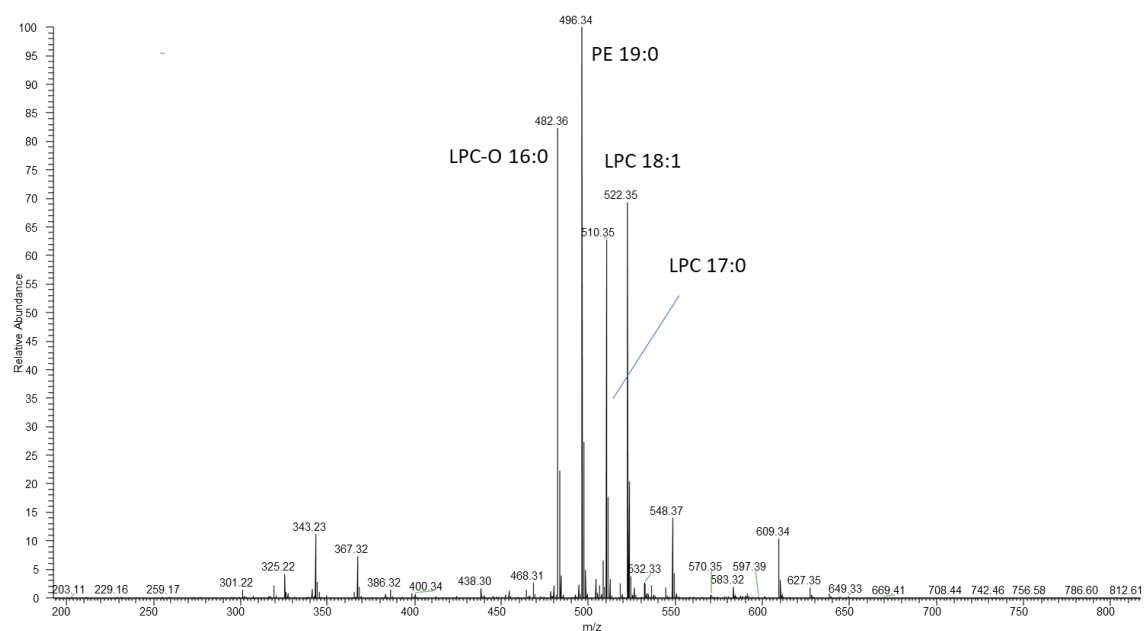

**Figure S13.** Positive polarity average spectrum between 7.1 and 7.6 minutes after injection of a non-hydrolyzed extract of mussel sample.

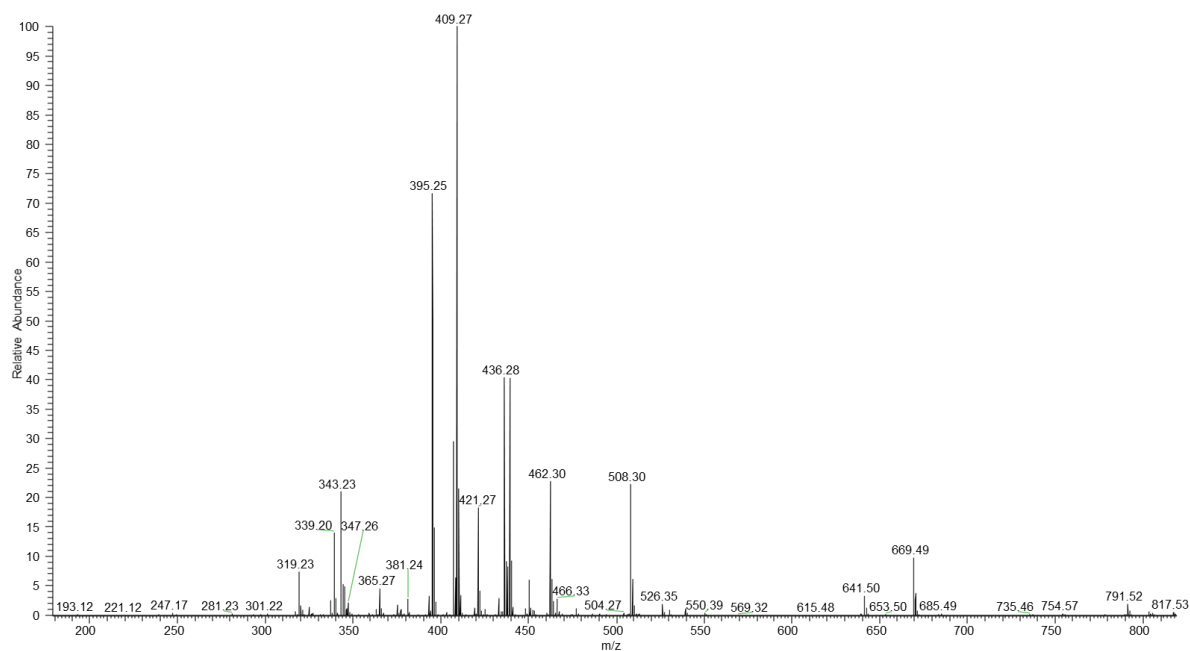

**Figure S14.** Negative polarity average spectrum between 7.1 and 7.6 minutes after injection of a hydrolyzed extract of mussel sample.

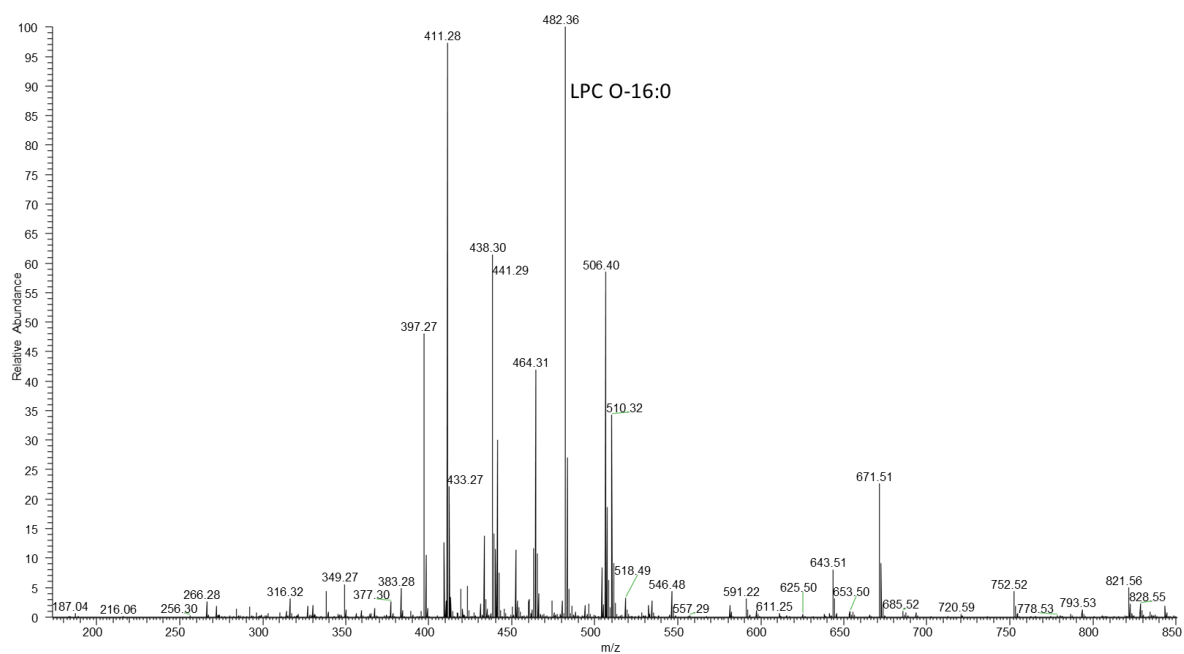

**Figure S15.** Positive polarity average spectrum between 7.1 and 7.6 minutes after injection of a hydrolyzed extract of mussel sample.

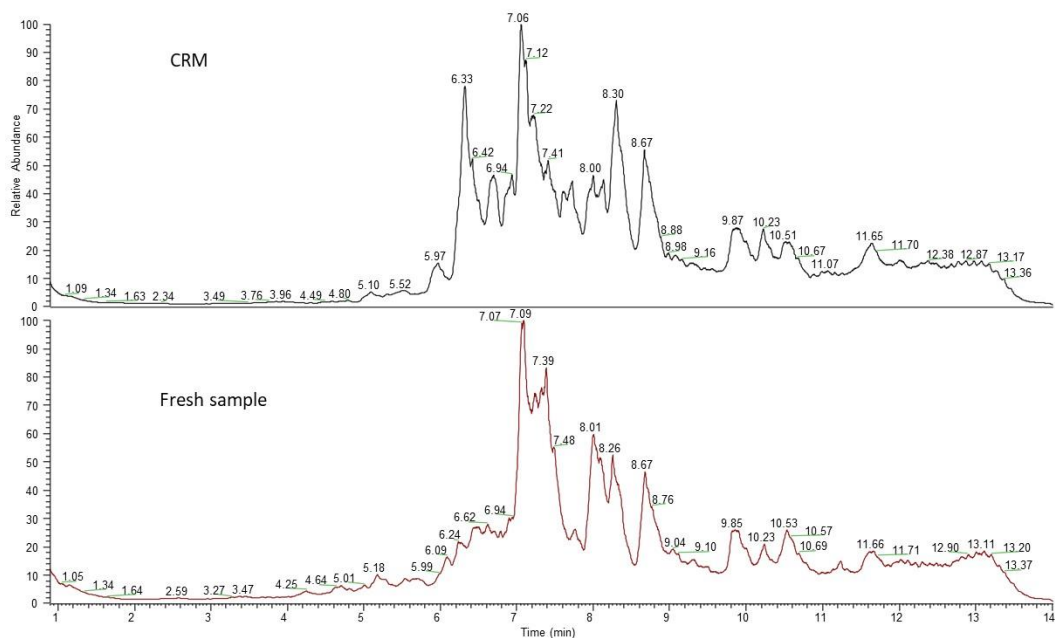

**Figure S16.** LC-HR-MS negative polarity profiles of extracts of a CRM sample and a mussel sample.

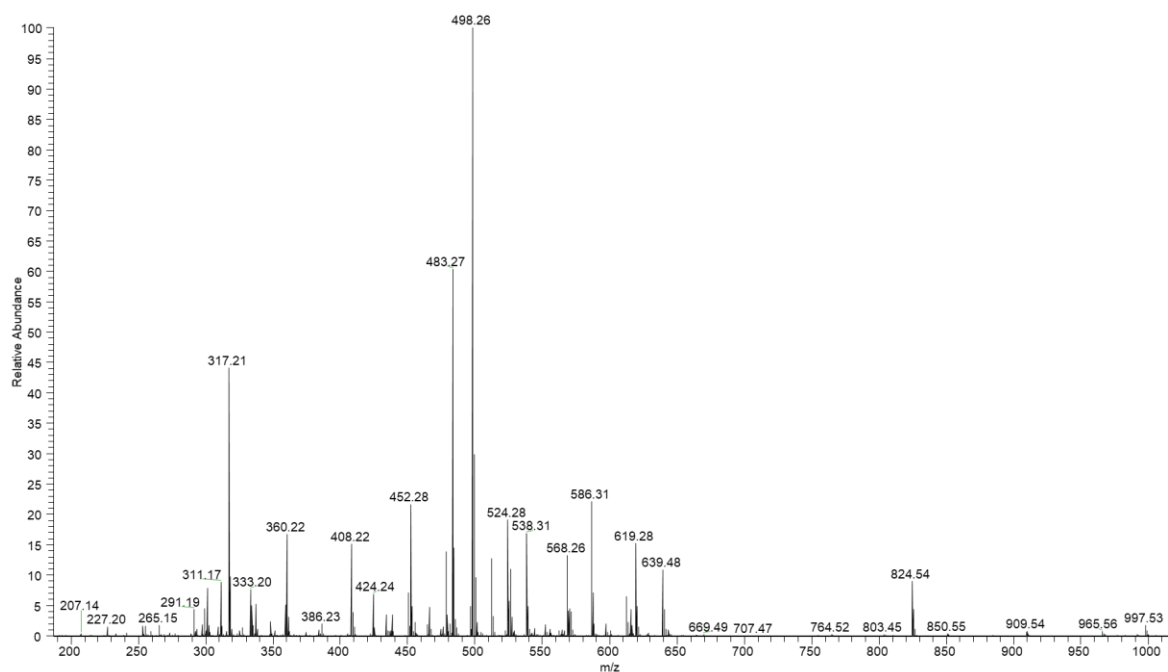

**Figure S17.** Negative polarity average spectrum between 6.1 and 6.7 minutes after injection of a non-hydrolyzed extract of CRM-Zero-Mus sample.

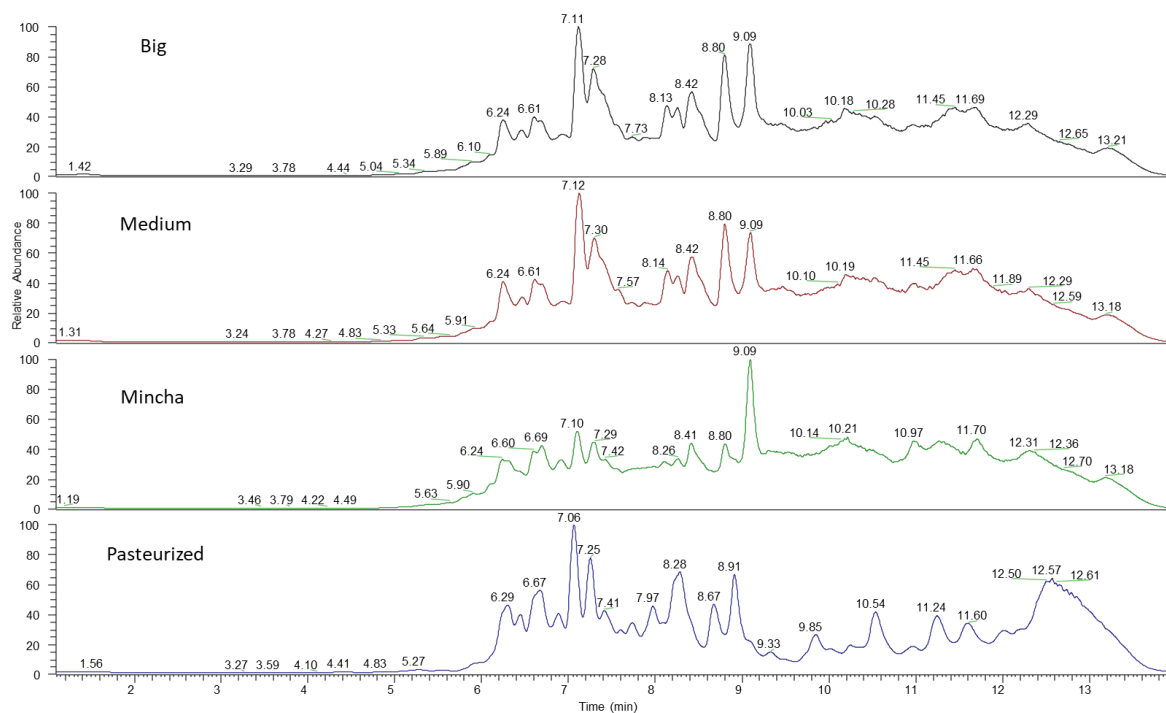

**Figure S18.** LC-HR-MS profiles of extracts of Pasteurized, Mincha, Medium and Large mussels under negative polarity.

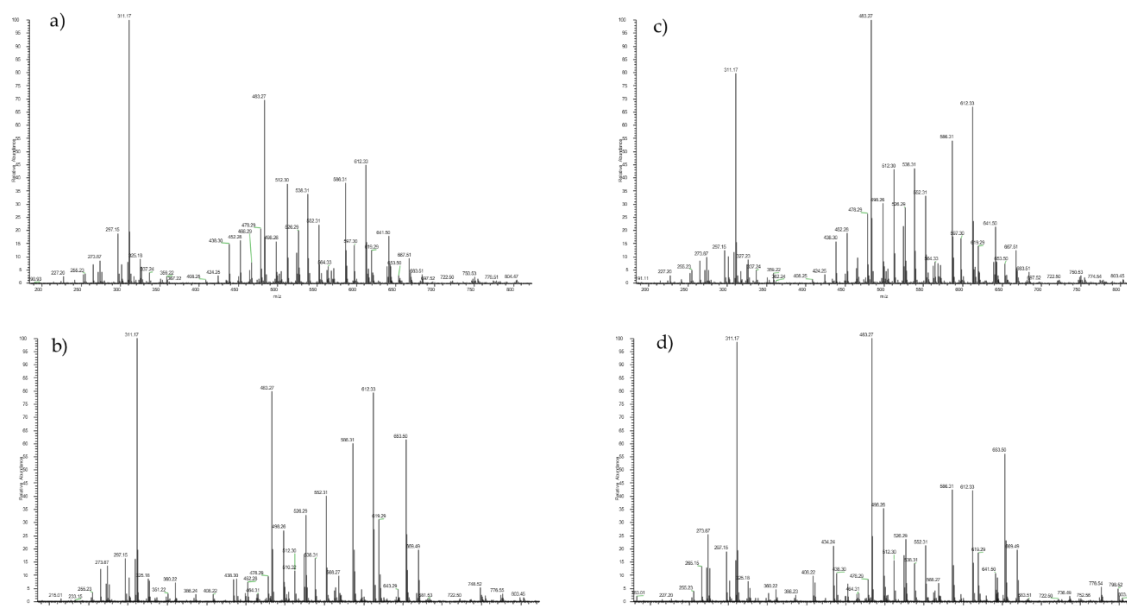

**Figure S19.** Average negative polarity spectra of processed mussel samples between 6.1 and 6.7 min. a) Big; b) Medium; c) Mincha; d) Pasteurized.

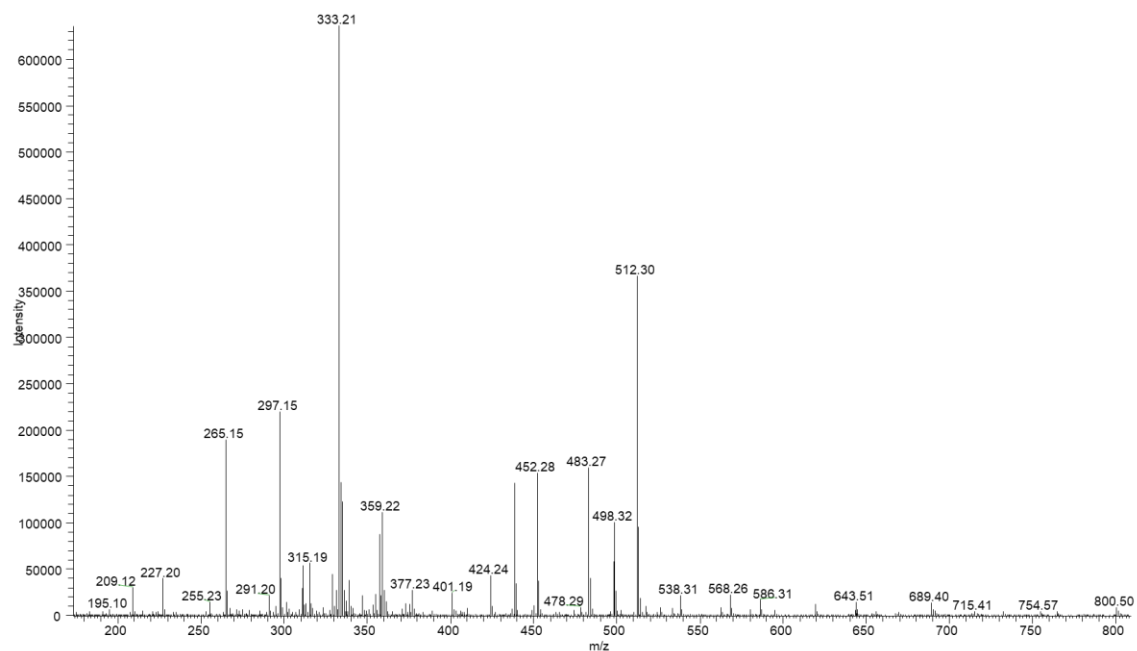

**Figure S20.** Negative polarity average spectrum between 6.2 and 6.4 minutes (OA) after injection of a non-hydrolyzed extract of mussel sample.

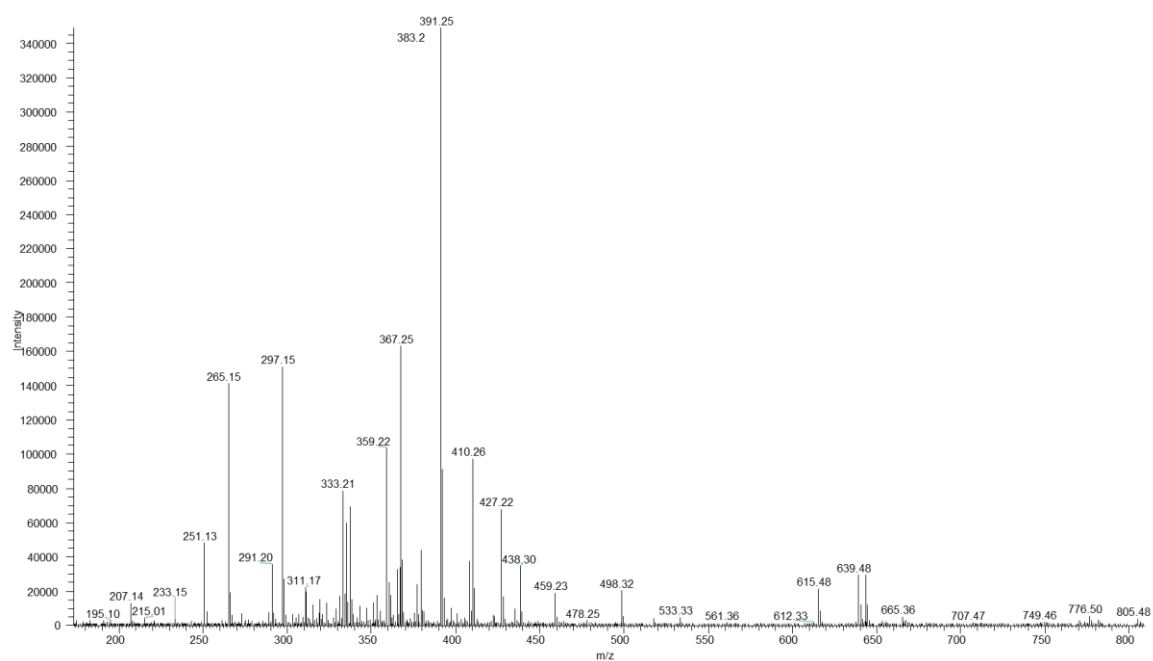

**Figure S21.** Negative polarity average spectrum between 6.2 and 6.4 minutes (OA) after injection of an hydrolyzed extract of mussel sample.

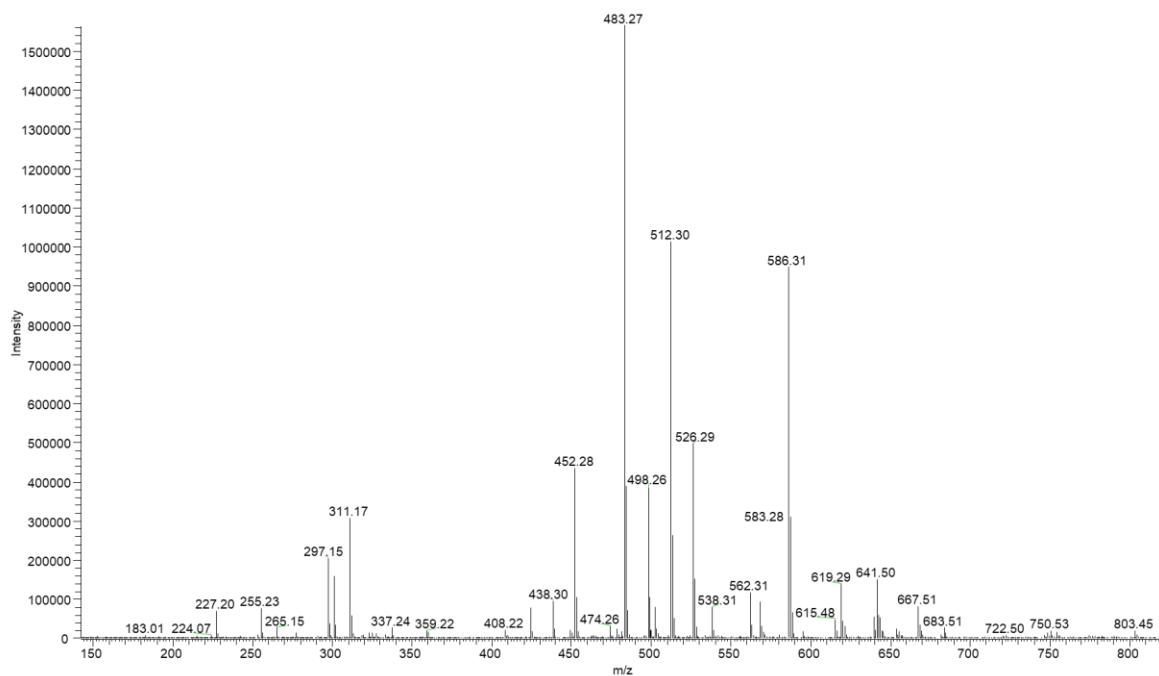

**Figure S22.** Negative polarity average spectrum between 6.2 and 6.4 minutes (OA) after injection of sample Big.

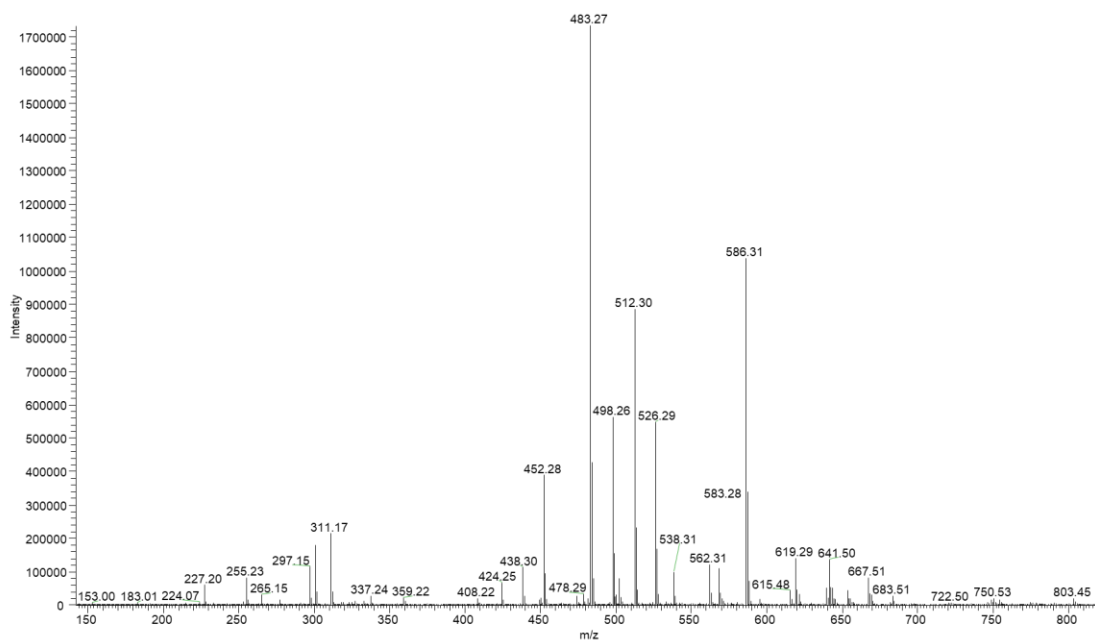

**Figure S23.** Negative polarity average spectrum between 6.2 and 6.4 minutes (OA) after injection of sample Medium.

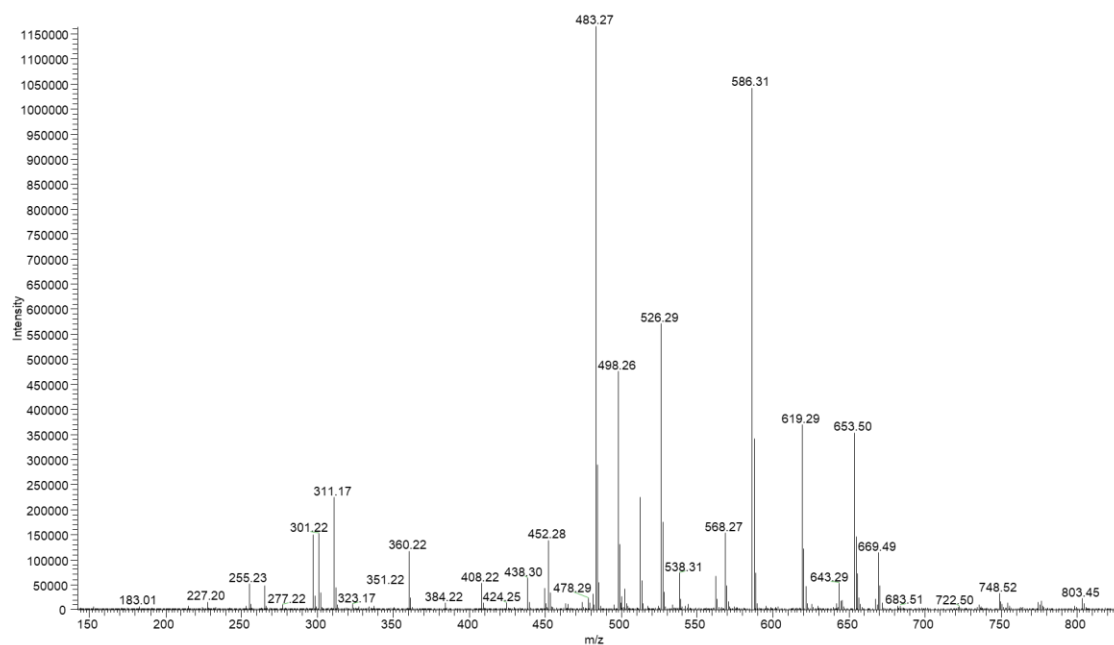

**Figure S24.** Negative polarity average spectrum between 6.2 and 6.4 minutes (OA) after injection of sample Mincha.

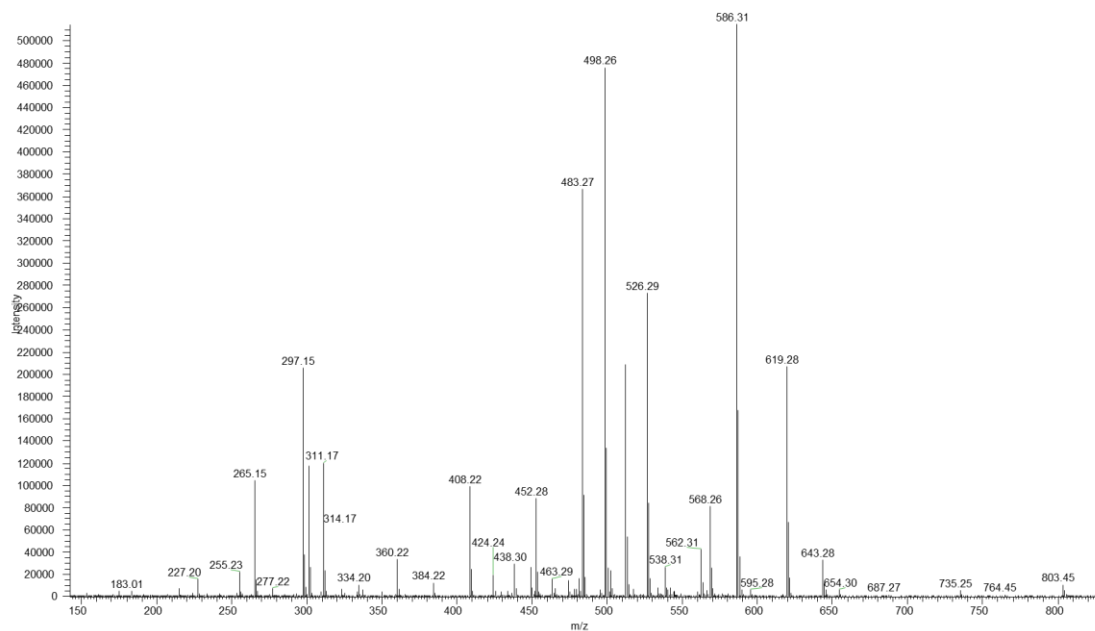

**Figure S25.** Negative polarity average spectrum between 6.2 and 6.4 minutes (OA) after injection of sample Pasteurized.

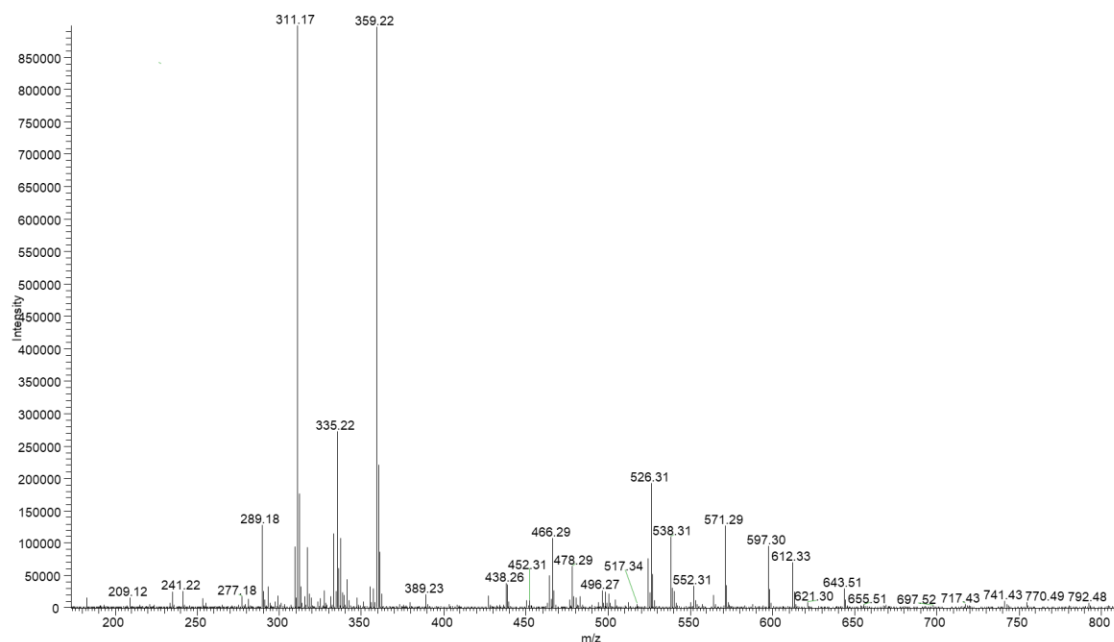

**Figure S26.** Negative polarity average spectrum between 6.5 and 6.7 minutes (OA) after injection of a non-hydrolyzed extract of mussel sample.

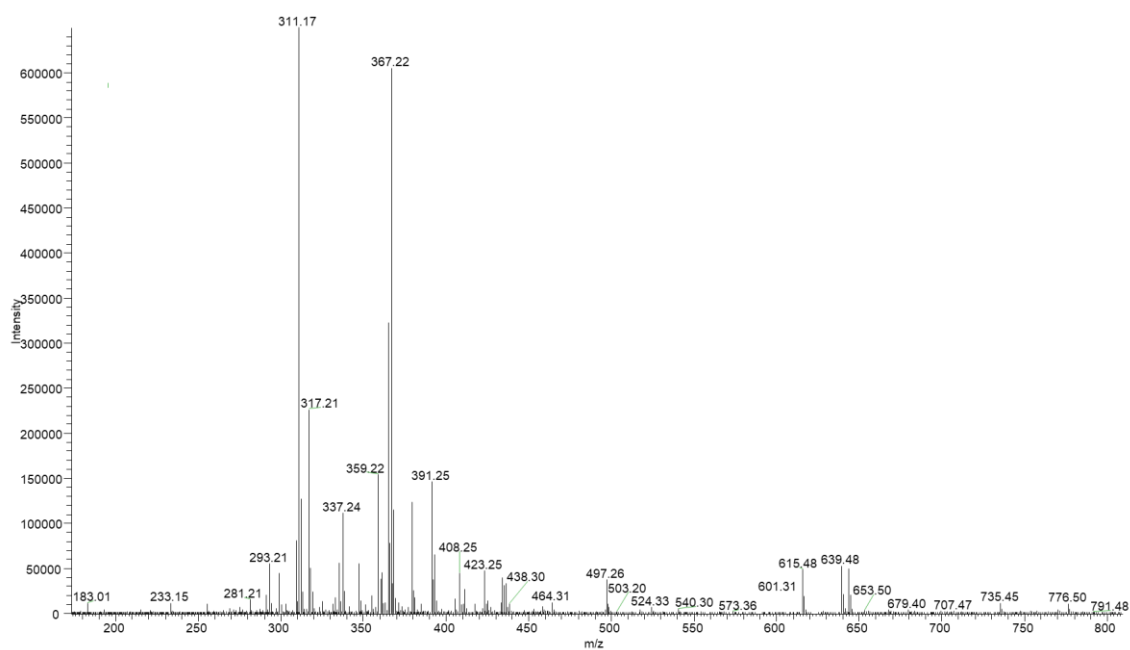

**Figure S27.** Negative polarity average spectrum between 6.5 and 6.7 minutes (OA) after injection of hydrolyzed extract of mussel sample.

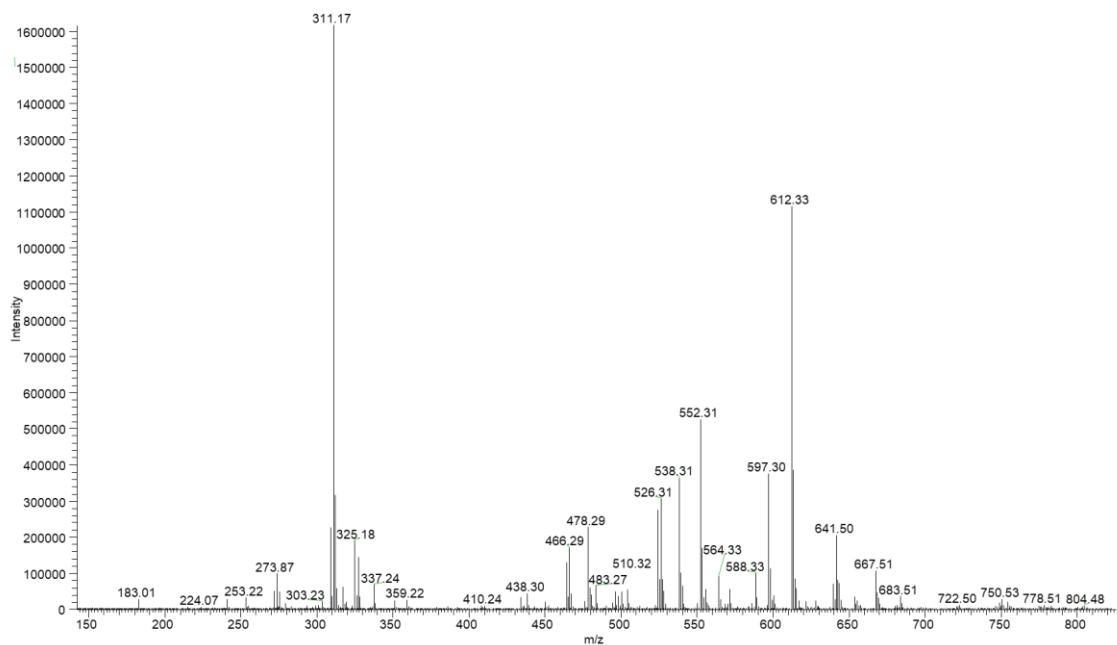

**Figure S28.** Negative polarity average spectrum between 6.5 and 6.7 minutes (OA) after injection of sample Big.

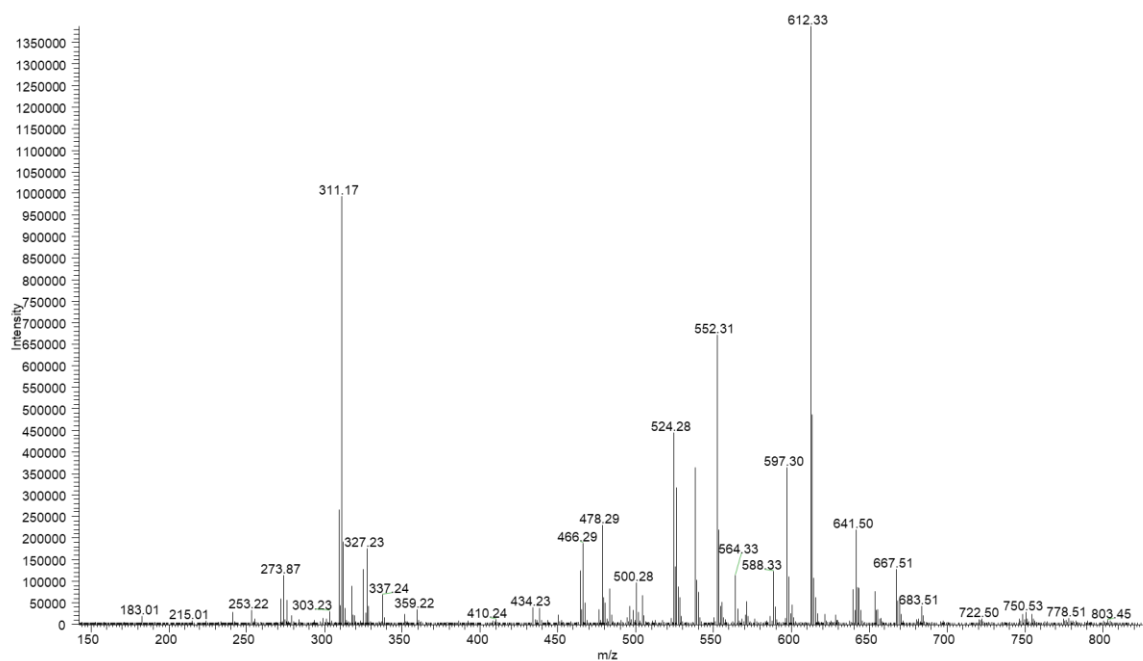

**Figure S29.** Negative polarity average spectrum between 6.5 and 6.7 minutes (OA) after injection of sample Medium.

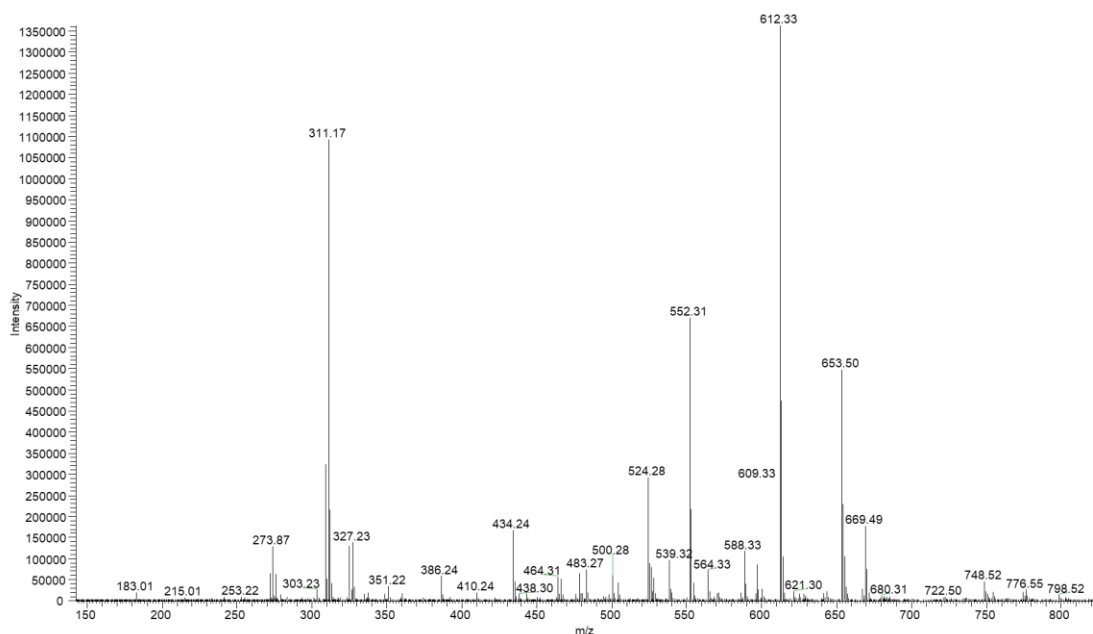

**Figure S30.** Negative polarity average spectrum between 6.5 and 6.7minutes (OA) after injection of sample Mincha.

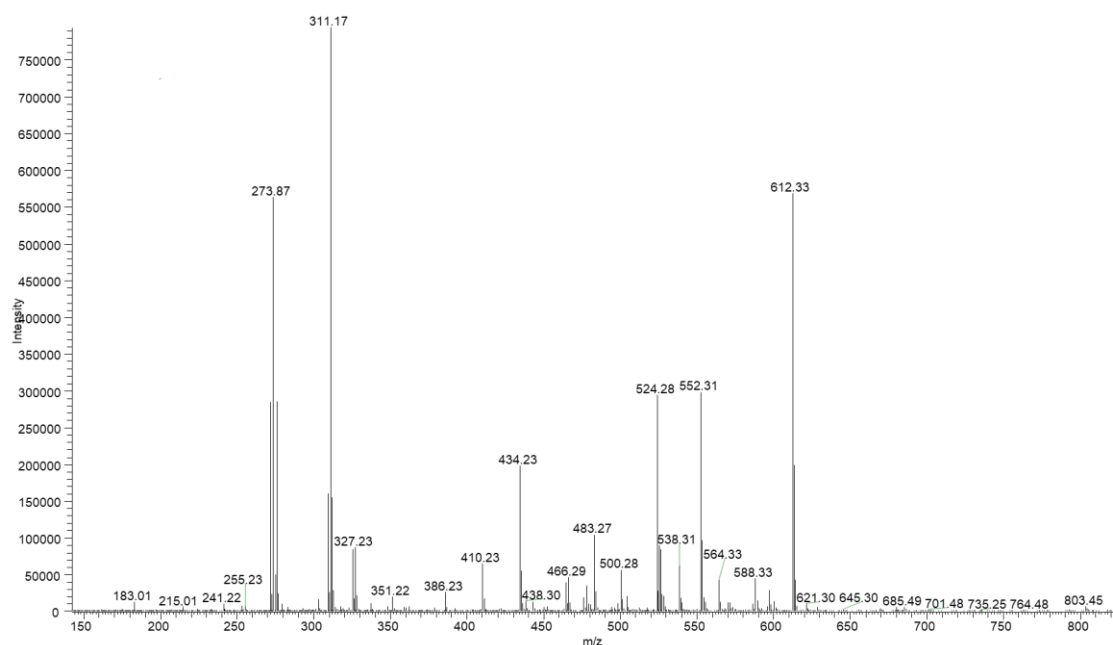

**Figure S31.** Negative polarity average spectrum between 6.5 and 6.7minutes (OA) after injection of sample Pasteurized.

**Table S2.** Matrix effects and correspondent % RSD (in-batch) on OA and DTX-2 in contaminated processed samples (n=3).

| Toxin/sample | Big (% RSD) | Medium (% RSD) | Mincha (% RSD) | Pasteurized (% RSD) |
|--------------|-------------|----------------|----------------|---------------------|
| OA           | 162 (5.4)   | 114 (4.1)      | 104 (7.0)      | 54 (7.2)            |
| DTX-2        | 160 (6.2)   | 122 (4.8)      | 166 (5.4)      | 55 (4.9)            |
